# Supplementary material for: JAK inhibitors disrupt T cell-induced proinflammatory macrophage activation
Source: PubMed Central journal article supplement (PMC9815080; doi:10.1136/rmdopen-2022-002671), 2023-01-04

# **Supplemental Material**

**Nyirenda et al**

## Supplemental Figure 1. Cytokine activated CD4<sup>+</sup> T cells (Tck) induce contact- and concentration-dependent TNF $\alpha$ production by human macrophages.

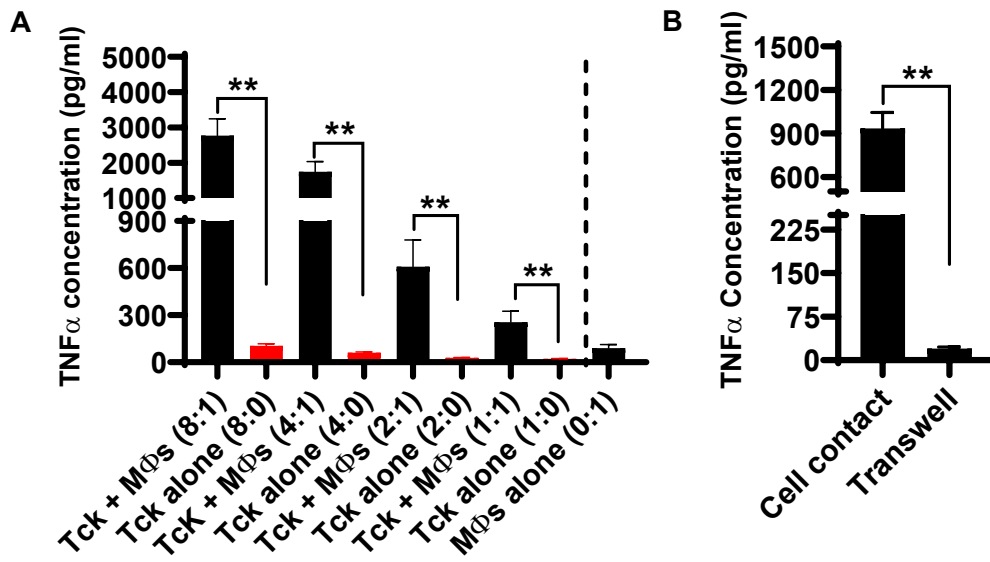

## Supplemental Figure 2. Tofacitinib, ruxolitinib and AG-490 tryphostin inhibit TNF $\alpha$ production by Tck cell-activated macrophages.

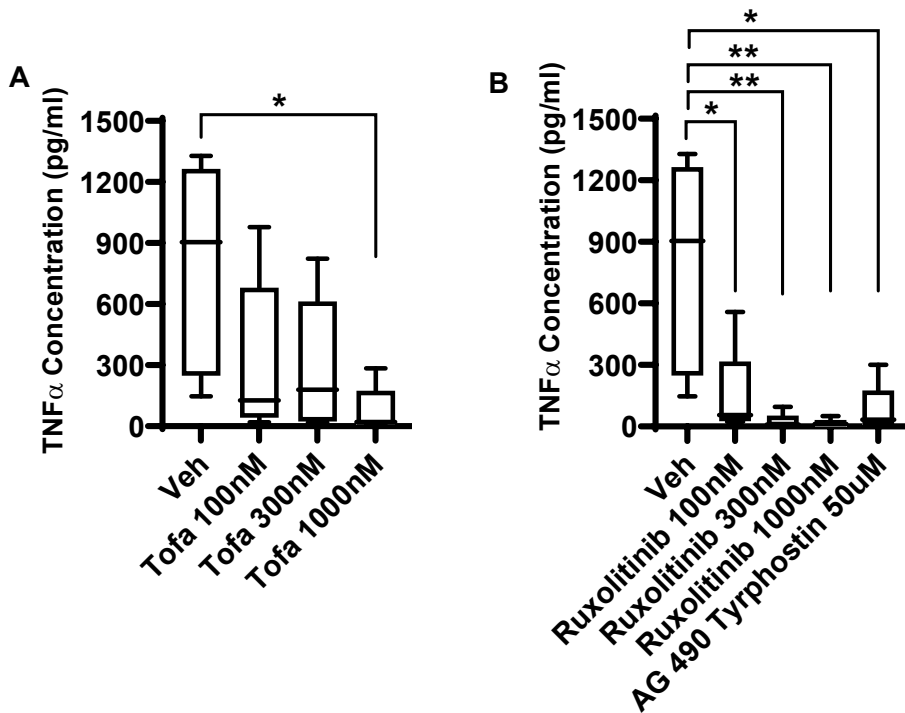

## Supplemental Figure 6. JAK inhibition breaks the cytokine and chemokine inflammation cycle induced by cytokine-stimulated T cells (Tck).

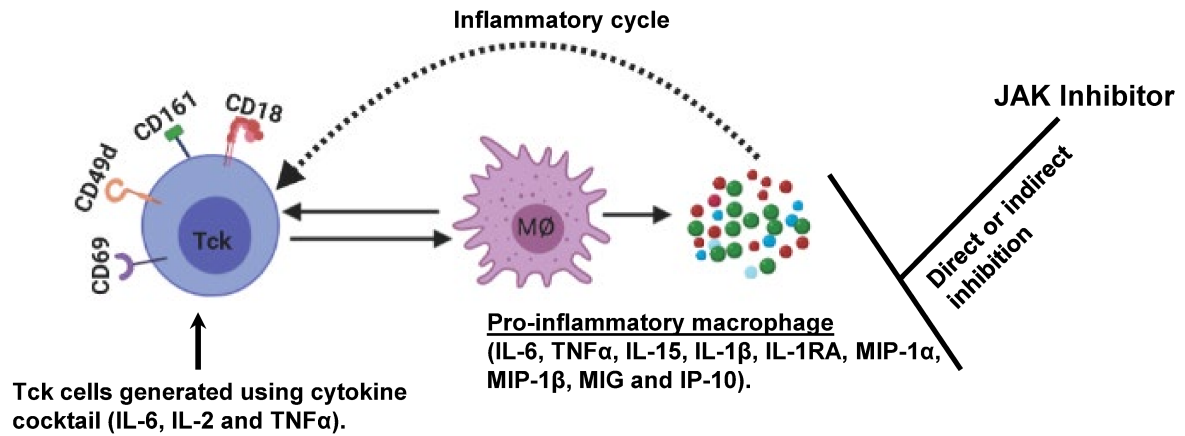

Supplement: rmdopen-2022-002671supp001.pdf [file rmdopen-2022-002671supp001.pdf]
